# Supplementary material for: Imaging Isomers on a Biological Surface: A Review
Source: PubMed Central journal article supplement (PMC7035452; doi:10.5702/massspectrometry.a0078), 2019-12-27
Supplement: massspectrometry-8-1-A0078-s001.pdf [file massspectrometry-8-1-A0078-s001.pdf]

| Abbreviation    | Definition                                                                                      |
|-----------------|-------------------------------------------------------------------------------------------------|
| CA              | 4-hydroxy-3-methoxycinnamaldehyde                                                               |
| CID             | Collision-induced dissociation                                                                  |
| CRF             | Charge-remote fragmentation                                                                     |
| Da              | Dalton                                                                                          |
| DESI            | Desorption electrospray ionization                                                              |
| DPP-TFB         | 2,4-diphenyl-pyranilium tetrafluoroborate                                                       |
| DTIMS           | Drift tube ion mobility spectrometry                                                            |
| ESI             | Electrospray ionization                                                                         |
| FAIMS           | High-field asymmetric waveform ion mobility spectrometry                                        |
| FLEC            | (+)-1-(9-fluorenyl)ethyl chloroformate                                                          |
| FTICR           | Fourier transform ion cyclotron resonance                                                       |
| FTMS            | Fourier transform mass spectrometry                                                             |
| GABA            | $\gamma$ -Aminobutyric acid                                                                     |
| GirT            | Girard reagent T                                                                                |
| H&E             | Hematoxylin and Eosin                                                                           |
| HE-CID          | High-energy CID                                                                                 |
| IMS             | Ion mobility spectrometry                                                                       |
| LAESI           | Laser ablation electrospray ionization                                                          |
| LC              | Liquid chromatography                                                                           |
| LESA            | Liquid extraction surface analysis                                                              |
| MALDI           | Matrix-assisted laser desorption/ionization                                                     |
| MALDI-2         | Laser-induced post-ionization                                                                   |
| <i>m</i> CPBA   | <i>Meta</i> -chloroperoxybenzoic acid                                                           |
| MRM             | Multiple reaction monitoring                                                                    |
| MS              | Mass spectrometry                                                                               |
| MS/MS           | Tandem mass spectrometry                                                                        |
| MS <sup>3</sup> | Triple tandem mass spectrometry                                                                 |
| MSI             | Mass spectrometry imaging                                                                       |
| <i>o</i> -TOF   | Orthogonal time-of-flight                                                                       |
| OzID            | Ozone-induced dissociation                                                                      |
| PB              | Paternò-büchi                                                                                   |
| PC              | Phosphatidylcholine                                                                             |
| PE              | Phosphatidylethanolamine                                                                        |
| PG              | Phosphatidylglycerol                                                                            |
| ppm             | Parts per million                                                                               |
| PTM             | Post-translational modification                                                                 |
| QqQ             | Triple-quadrupole                                                                               |
| QTOF            | Hybrid quadrupole mass analyzer with a TOF                                                      |
| SIMS            | Secondary ion mass spectrometry                                                                 |
| TAHS            | <i>p</i> - <i>N,N,N</i> -trimethylammonioanilyl <i>N'</i> -hydroxysuccinimidyl carbamate iodide |
| TEM             | Transmission electron microscopy                                                                |
| TIMS            | Trapped ion mobility spectrometry                                                               |
| TOF             | Time-of-flight                                                                                  |
| TWIMS           | Traveling wave ion mobility spectrometry                                                        |
| UV              | Ultraviolet                                                                                     |
| UVPD            | Ultraviolet photodissociation                                                                   |
